1 **Title: Protein Vaccine Induces a Durable, More Broadly Neutralizing Antibody Response**  
2 **in Macaques than Natural Infection with SARS-CoV-2 P.1**

3

4 **Authors:** Albert To<sup>1</sup>, Teri Ann S. Wong<sup>1</sup>, Michael M. Lieberman<sup>1</sup>, Karen Thompson<sup>2</sup>, Laurent  
5 Pessaint<sup>3</sup>, Jack Greenhouse<sup>3</sup>, Nisrine Daham<sup>3</sup>, Anthony Cook<sup>3</sup>, Brandon Narvaez<sup>3</sup>, Zack  
6 Flinchbaugh<sup>3</sup>, Alex Van Ry<sup>3</sup>, Jake Yalley-Ogunro<sup>3</sup>, Hanne Andersen Elyard<sup>3</sup>, Chih-Yun Lai<sup>1</sup>,  
7 Oreola Donini<sup>4</sup>, Axel T. Lehrer<sup>1\*</sup>

8

9 **Affiliations:**

10 <sup>1</sup>Department of Tropical Medicine, Medical Microbiology, and Pharmacology, John A. Burns  
11 School of Medicine, University of Hawai'i at Mānoa, Honolulu, HI, USA

12 <sup>2</sup>Department of Pathology, John A. Burns School of Medicine, University of Hawai'i at Mānoa,  
13 Honolulu, HI, USA

14 <sup>3</sup>Bioqual Inc., Rockville, MD, USA

15 <sup>4</sup>Soligenix, Inc, Princeton, NJ, USA

16

17 \*Corresponding author at: Axel T. Lehrer: ([lehrer@hawaii.edu](mailto:lehrer@hawaii.edu)). University of Hawai'i at Mānoa,  
18 John A. Burns School of Medicine, Department of Tropical Medicine, 651 Ilalo Street, Honolulu,  
19 HI 96813, United States

20

21 **One Sentence Summary:** A recombinant subunit protein formulated with CoVaccine HT™  
22 adjuvant induces superior immunity than natural infection and reduces viral load while protecting  
23 cynomolgus macaques from COVID-19-like disease caused by late SARS-CoV-2 P.1 (Gamma)  
24 challenge.

25

26 **Abstract:** FDA-approved and Emergency Use Authorized (EUA) vaccines using new mRNA  
27 and viral-vector technology are highly effective in preventing moderate to severe disease,  
28 however, information on their long-term efficacy and protective breadth against SARS-CoV-2  
29 Variants of Concern (VOCs) is currently scarce. Here we describe the durability and broad-  
30 spectrum VOC immunity of a prefusion-stabilized spike (S) protein adjuvanted with liquid or  
31 lyophilized CoVaccine HT™ in cynomolgus macaques. This recombinant subunit vaccine is  
32 highly immunogenic and induces robust spike-specific and broadly neutralizing antibody  
33 responses effective against circulating VOCs (B.1.351 [Beta], P.1 [Gamma], B.1.617 [Delta]) for  
34 at least 3 months after the final boost. Protective efficacy and post-exposure immunity were  
35 evaluated using a heterologous P.1 challenge nearly 3 months after the last immunization. Our  
36 results indicate that while immunization with both high and low S doses shorten and reduce viral  
37 loads in the upper and lower respiratory tract, a higher antigen dose is required to provide  
38 durable protection against disease as vaccine immunity wanes. Histologically, P.1 infection  
39 causes similar COVID-19-like lung pathology as seen with early pandemic isolates. Post-  
40 challenge IgG concentrations were restored to peak immunity levels and vaccine-matched and  
41 cross-variant neutralizing antibodies were significantly elevated in immunized macaques  
42 indicating an efficient anamnestic response. Only low levels of P.1-specific neutralizing  
43 antibodies with limited breadth were observed in control (non-vaccinated but challenged)  
44 macaques suggesting that natural infection may not prevent reinfection by other VOCs. Overall,  
45 these results demonstrate that a properly dosed and adjuvanted recombinant subunit vaccine  
46 can provide long-lasting and protective immunity against circulating VOCs.

47

48 **Main Text:**

49

## 50 **INTRODUCTION**

51 COVID-19 is a respiratory disease caused by the Severe Acute Respiratory Syndrome

52 Coronavirus 2 (SARS-CoV-2) (1, 2) and is commonly characterized as an asymptomatic

53 infection or a self-limiting, febrile illness co-presenting with cough, shortness of breath, and  
54 fatigue (3, 4). Severe complications can result in approximately 6-10% of infected patients (5)  
55 developing pneumonia, acute respiratory distress syndrome, multi-organ dysfunction and  
56 arterial thromboembolic events that can result in hospitalization and/or death (6-9).  
57 Transmission occurs through respiratory droplets during close contact with asymptomatic or  
58 presymptomatic infected individuals (10-12). The synergistic relationship between the infectivity  
59 and high transmissibility with low virulence has contributed to the ongoing global public health  
60 crisis, and the emergence of more transmissible and potentially more pathogenic variants of  
61 concern (VOCs). Longitudinal cross-sectional studies have indicated only a fraction of  
62 asymptomatic to mild and moderate SARS-CoV-2 natural infections of humans results in  
63 detectable neutralizing antibodies months after recovery (13-15) and current evidence suggests  
64 that convalescent immunity may only provide transient protection (16-18). Furthermore, the  
65 degree of immune evasion witnessed *in vitro* by spike (S) protein variants and the increasing  
66 occurrence of reinfection (19-23) has raised the question whether previous infection or vaccine-  
67 derived immunity can provide heterologous protection against further transmission and limit  
68 additional mutation of circulating VOC, even while protection against severe disease and  
69 mortality has been sustained to date.

70

71 Some VOCs show increased transmissibility, cause more severe disease than original strains  
72 and demonstrate greater immune evasion to neutralizing antibodies as they harbor mutations at  
73 sites facilitating viral fusion (24, 25) and at critical epitopes in the N-terminal (NTD) and receptor  
74 binding domains (RBD). The B.1.1.7 (Alpha), B.1.351 (Beta) and P.1 (Gamma) variants contain  
75 the same set of mutations, K417T, E484K, and N501Y, while the B.1.617 (Delta) carries L452R  
76 and T478K mutations, all of which are associated with enhanced infectivity and reduced serum  
77 neutralization (26-28). These antigenic changes have abolished potent neutralizing epitopes  
78 targeted by monoclonal antibody therapeutics (29) and antibodies elicited by mRNA vaccination

79 (30). Natural reinfection with the VOC strains after original strain infection, and *vice versa*, has  
80 been documented (20, 31-34). Despite this, cross-neutralization of convalescent sera from  
81 patients infected with non-variants and mRNA immunized individuals suggests that the parental  
82 spike (S) protein in current vaccines affords some degree of protection (35-37).

83

84 Phase 1-3 clinical trials of novel mRNA (Moderna mRNA-1273 and Pfizer-BioNTech BNT162b2)  
85 and viral-vector (Johnson & Johnson-Janssen Ad26.COVS) platform, utilizing the original  
86 Wuhan-Hu-1 S protein (38-40), have shown these vaccines to be highly protective with 94-95%  
87 and 67% efficacy against COVID-19 disease, respectively (41-43), and they all elicit uniformly  
88 high protection against severe disease/death (i.e., >85%). Post-hoc sequencing during clinical  
89 trials of these and other vaccine platforms in variant-dominant regions have revealed a slightly  
90 lower efficacy against B.1.1.7 and B.1.351 variants, albeit usually remaining above the 50%  
91 protection threshold (44, 45). Attempts at predicting protection based on immune correlates,  
92 such as cross-neutralizing antibodies, have shown that vaccinated individuals had a 2 to 5-fold  
93 reduction in titers against current VOCs as IgG levels wane, which are nonetheless believed to  
94 confer a degree of resistance against infection (46-49). However, these samples were taken  
95 during the peak period of the humoral response and may not be accurate predictors of  
96 protection months onwards when the likelihood of infection is greater. Thus, understanding the  
97 decay in antibody responses months after the final boost is an essential endpoint in vaccine  
98 development.

99

100 Evaluating a delayed vaccine response in non-human primate (NHP) models can provide  
101 valuable foresight into the relationship between waning immunity and protection, especially  
102 against VOCs. In this study, we describe the immunogenicity and protective efficacy of a  
103 recombinant pre-fusion spike subunit (based on the reference SARS-CoV-2 strain, Wuhan-Hu-  
104 1) adjuvanted with liquid or lyophilized (dry) CoVaccine HT™, a squalane-in-water

105 nanoemulsion adjuvant containing immunostimulatory sucrose fatty acid sulfate esters (50), in  
106 cynomolgus macaques. Other investigators have shown that infection with SARS-CoV-2  
107 (prototype strain) produced COVID-19-like disease in this species and reflects similar viral  
108 shedding kinetics and lung pathology as human infections (51, 52). We have previously  
109 demonstrated that our vaccine candidate elicits a broad-spectrum IgG response including high  
110 neutralizing antibody (NtAb) titers against the prototypic SARS-CoV-2 and VOCs, specifically  
111 B.1.351 and P.1, and an *in vitro* antigen-specific IFN- $\gamma$  secreting response from immune  
112 splenocytes taken from Swiss Webster mice (53). To elaborate on our understanding of the  
113 elicited immunological response, we assessed the vaccine efficacy using a delayed challenge  
114 scheme with the P.1 VOC to delineate how the maturation and/or decay of the humoral  
115 response affects protection from a heterologous SARS-CoV-2 strain. Neutralizing antibody  
116 responses to the vaccine-matched WA1/2020 strain, and VOCs, B.1.351, P.1 and B.1.617 were  
117 also determined just prior to challenge and 14 days post-challenge (to assess anamnestic  
118 responses). Furthermore, we characterize the viral kinetics and histopathological changes post-  
119 challenge in the lower and upper respiratory tracts of control (non-vaccinated, challenged), and  
120 protected NHPs. To our knowledge, this is the first published account of P.1 VOC challenge in  
121 NHPs.

122

## 123 **RESULTS**

### 124 **Spike antigen with either liquid or lyophilized CoVaccine HT™ elicits a durable humoral** 125 **response**

126 Twelve Cynomolgus macaques were assigned into four groups and received two immunizations  
127 with 5 (Group A) or 25 (Group B and C)  $\mu$ g liquid prefusion spike trimer (S) antigen formulated  
128 with either lyophilized (Group A and C) or liquid (Group B) CoVaccine HT™ adjuvant, or one  
129 dose of a co-lyophilized CoVaccine HT™-adjuvanted control containing an unrelated viral  
130 glycoprotein antigen (Group D) (Fig. 1A). The two doses were administered within a three-week

131 interval and all NHPs were challenged with the P.1 isolate 12 weeks post-boost (~ 3 months,  
132 study week 15). Wuhan-Hu-1 S- and RBD-specific IgG titers were measured by a multiplexed  
133 microsphere immunoassay (MIA) using insect cell expressed antigens coupled onto spectrally  
134 distinct, magnetic beads as described previously (53). Serum S-specific IgG concentrations  
135 were interpolated using a standard curve generated from S-specific human IgG purified from  
136 vaccinated individuals (Fig. 1B). RBD-specific IgG titers were read out as median fluorescence  
137 intensity (MFI) (Fig. S1). All NHP immunized with the adjuvanted S at both antigen doses  
138 seroconverted after the prime (week 3) with S-specific antibodies in the range of 20 to 70  
139  $\mu\text{g/mL}$ , and peak serum IgG concentrations detected two weeks after the boost (week 5) in the  
140 range of 70 to 753  $\mu\text{g/mL}$ . Macaques given a 25  $\mu\text{g}$  dose of S demonstrated a greater IgG  
141 response to the antigen compared to those receiving 5  $\mu\text{g}$ . RBD-specific IgG titers followed a  
142 similar trend. As expected, animals in group D receiving an unrelated antigen did not develop  
143 any detectable S-specific IgG during this phase of the study. S-specific IgG remained detectable  
144 12 weeks after the boost (week 15) although IgG concentrations dropped 3.0 to 9.9-fold relative  
145 to the prior peak titer.

146

147 The titer of NtAb against the prototype WA1/2020 strain was determined using a standard  
148 PRNT with wild-type virus (Fig. 1C). NtAb from one animal in Group C was detectable after the  
149 prime (week 3). All S-immunized NHPs developed a potent neutralizing response, peaking two  
150 weeks after the boost (week 5) and generally remaining stable one week later (week 6). The  
151 group receiving 5  $\mu\text{g}$  of the antigen showed the greatest variability. Nearly all immunized NHPs  
152 maintained neutralization capacity, with PRNT<sub>50</sub> greater than 1:150 dilution, 12 weeks after the  
153 final immunization (week 15). NtAbs from groups receiving 25  $\mu\text{g}$  S either remained stable or  
154 decreased up to 3.0-fold, while the group receiving 5  $\mu\text{g}$  S declined ~2.9-9.2-fold. A similar  
155 reduction in serum neutralization was also verified using a surrogate rVSV-SARS-CoV-2 S  
156 PRNT assay (Fig. S2).

157

158 **A recombinant subunit vaccine induces stable neutralizing antibodies against VOCs**

159 Circulating SARS-CoV-2 VOCs can evade vaccine-induced antibody responses and are  
160 associated with breakthrough infections in those fully immunized, especially as antibody titers  
161 wane (54-60). To determine whether an adjuvanted, prototypic Wuhan-Hu-1 S subunit can  
162 generate durable cross-variant neutralizing antibodies, PRNTs using WT B.1.351, P.1, and  
163 B.1.617 isolates were determined with sera collected at the time of peak neutralization and 12  
164 months after the final immunization, a timepoint at which antibody titers are expected to have  
165 waned. At week 6, potent neutralization of the B.1.351, P.1 and B.1.617 VOC was detected,  
166 although 10.7-, 10.7- and 5.7-fold lower, respectively, compared to WA1/2020 in all vaccine  
167 groups (Fig. 2A). As antibody titers waned 10 weeks later (study week 15) the gap between  
168 neutralization titers against the WA1/2020 strain to the VOC isolates narrowed to a 4.5-, 6.3-  
169 and 5.1-fold difference (Fig. 2B) driven by a proportionally larger decline in WA1/2020-specific  
170 neutralizing activity. At this later time point, all S-immunized macaques, except for a single  
171 macaque in Group A, maintained a detectable PRNT<sub>50</sub> titer greater than 1:40 dilution. A few  
172 macaques in Groups B and C demonstrated greater VOC neutralization at week 15 compared  
173 to week 6, suggesting a refinement or “maturation” of the humoral response towards  
174 neutralizing epitopes during this interval.

175

176 **Immunization with recombinant subunits reduces viral burden from delayed P.1 (Gamma)**  
177 **challenge**

178 The characterization of the prototype strain and B.1.351 variant infections in NHP models has  
179 been described previously (51, 52, 61-63). Here we characterize the clinical signs and  
180 histological events of a P.1 VOC infection in cynomolgus macaques and determine whether a  
181 prefusion spike subunit formulated with CoVaccine HT™ is effective at reducing viral load  
182 against a circulating VOC after a 12-week interval following the final immunization. All NHPs

183 were challenged with a total of  $1 \times 10^6$  TCID<sub>50</sub> of the P.1 isolate using simultaneous intranasal  
184 and intratracheal inoculation routes. None of the NHPs challenged developed visible clinical  
185 signs of respiratory disease throughout the study, consistent with WA1/2020 strain infected  
186 cynomolgus macaques (51). Bronchioalveolar lavages (BAL) from the lower respiratory tract,  
187 and nasal and oral swabs (NS and OS respectively) from the upper respiratory tract were  
188 collected at days 2, 4, 7, 10 and 14 after challenge to detect infectious virus, genomic RNA or  
189 signs of viral replication. High levels of infectious virus, GMT Log<sub>10</sub> TCID<sub>50</sub> titer of 5.8 and 4.8,  
190 were recovered two days post-challenge from the NS and BAL, respectively, from control  
191 macaques (Group D, Fig. 3A & 3D and S3A-B). Infectious virus continued to be detectable in  
192 both anatomic sites until at least day 7 post-challenge before becoming undetectable on day 10.  
193 All S-immunized NHPs presented TCID<sub>50</sub> titers at least 1-2 Log<sub>10</sub> lower than control macaques  
194 in both locations at all timepoints throughout the study, indicating protection conferred by both 5  
195 and 25 µg S formulations of the subunit vaccine. No infectious virus could be cultured from the  
196 BAL in S-immunized macaques by day 7. Infectious virus from the NS was recoverable from  
197 immunized macaques throughout the study period and was variable between groups, however  
198 these macaques on average had TCID<sub>50</sub> at least 1-2 Log<sub>10</sub> below those of control animals.

199  
200 Quantitative RT-PCR was used as an additional measurement for viral load. We detected the  
201 presence of viral RNA and viral replication throughout the 14-day study period in both the lower  
202 (Fig 3B-C, S4A-C and S5A-C) and upper (Fig 3E-F, S4D-F and S5D-F) respiratory airways and  
203 from the oral cavity (Fig 3G-H, S4G-I and S5G-I). Quantification of viral RNA showed that both 5  
204 and 25 µg immunization had reduced the viral load by approximately 1-2 Log<sub>10</sub> RNA copies/mL  
205 (or swab) over Group D macaques, corroborating the TCID<sub>50</sub> results. Virus replication in the oral  
206 cavity was undetectable at least 3 days earlier in most S-immunized macaques than in the  
207 control group, suggesting a reduced potential for transmission. High levels of viral RNA and  
208 replication, between 5-6 Log<sub>10</sub> vgRNA and sgRNA copies/mL, respectively, were observed in



209 these control macaques before gradually resolving at day 10. Altogether, reduced viral loads at  
210 all tested anatomic locations in Groups A, B and C macaques indicate a degree of durable  
211 protection from P.1 VOC infection provided by an adjuvanted protein subunit vaccine.

212

### 213 **High dose spike antigen reduces lung histopathology caused by P.1 (Gamma) challenge**

214 Also consistent with previous prototype virus infection studies in cynomolgus macaques (51,  
215 52), P.1 challenge did not cause changes in weight, temperature nor demonstrate any  
216 observable signs of respiratory disease. To evaluate vaccine efficacy against COVID-19-like  
217 pathology, a section slide from each lung lobe and the bronchi was prepared from each  
218 macaque and stained with hematoxylin and eosin to survey for histopathological changes  
219 indicative of acute lung injury. The histopathological scoring system based on the  
220 presence/severity of edema, intraalveolar and interstitial inflammation, perivascular lymphocytic  
221 cuffing, and increased bronchiolar-associated lymphoid tissue (BALT) is outlined in Table S1. A  
222 cumulative average score was determined for each macaque based on the evaluation of these  
223 five characteristics per section for a total of 30 scores (Fig 4A). Significant differences in the  
224 cumulative average scores for each vaccine formulation vs. controls were determined using a  
225 one-way ANOVA followed by a Dunnett's multiple comparison test. Macaques in the control  
226 Group D appeared to have developed mild to moderate respiratory disease. The lower  
227 cumulative GMT scores of Groups B and C, immunized with 25  $\mu\text{g}$  S, suggests that these  
228 animals, except for a single macaque, were completely protected from lung pathology while all  
229 Group A (immunized with 5  $\mu\text{g}$  S) macaques appeared to have developed mild disease despite  
230 exhibiting lower viral loads. Week 15 WA1/2020 NtAb levels were determined to be inversely  
231 correlated, although weakly, with histopathology scores using a Spearman's correlation test ( $r=-$   
232 0.682,  $p=0.0178$ ) (Fig. 4B). Week 15 pre-challenge neutralizing antibody levels were lower in  
233 animals with higher histopathology scores, a trend seen with breakthrough infections in fully  
234 immunized individuals (64). The moderate disease seen in the control animals is demonstrated

235 in Fig. 5A, where a representative, low-power magnification shows a distribution of lymphocytic  
236 perivascular cuffing and clusters of intraalveolar macrophages. In contrast, immunized animals  
237 (especially those receiving the higher antigen dose), appeared to have milder disease without  
238 these pathological changes (Fig. 5B). Macaques developing mild to moderate disease exhibited  
239 absent to moderate, focal and multifocal edema and perivascular cuffing with marked  
240 lymphocytic infiltration (Figs. 6A-D). Syncytia of intraalveolar multinucleated giant cells  
241 surrounded by acute and eosinophilic inflammatory infiltrate (Fig. 6A.) or increased intraalveolar  
242 macrophages with interstitial lymphocytic inflammation, in addition to alveolar septal thickening  
243 and complete perivascular cuffing can be seen in a moderately diseased, control macaque (Fig.  
244 6B-C). Proteinaceous edema fluid filling alveolar spaces was also observed in unprotected  
245 macaques (Fig. 6D). While these histopathological changes were also noticed in protected  
246 macaques, the findings appeared less severe (Fig. 6E-F). A section from a protected macaque  
247 revealed a few intraalveolar multinucleated giant cells without an increase in intraalveolar  
248 macrophages, lymphocytic vascular cuffing, or interstitial inflammation (Fig. 6E). Similarly, only  
249 partial lymphocytic perivascular cuffing with adjacent alveolar epithelial hyperplasia was noticed  
250 without an increased intraepithelial macrophage infiltrate and normal alveolar septal thickness in  
251 immunized macaques receiving 25 µg of S (Fig. 6F).

252

### 253 **P.1 challenge recalls a broadly neutralizing anamnestic response and a variant-specific** 254 **primary neutralizing response in naïve macaques**

255 To better understand the immunological basis of events happening after late challenge, and to  
256 determine if P.1 challenge triggered an anamnestic response in immunized NHPs, post-  
257 challenge S-specific IgG concentrations and PRNT<sub>50</sub> titers were measured from sera collected  
258 upon necropsy at day 14. Late P.1 challenge significantly boosted serum IgG concentrations to  
259 levels attained at the post-immunization peak at Week 6, with less variance between animals,  
260 suggesting that a recall response was triggered by the heterologous infection (Fig. 7A).

261 Vaccine-matched (WA1/2020) and VOC neutralizing (i.e., B.1.351, P.1 and B.1.617) antibody  
262 levels were also all significantly boosted to levels attaining or surpassing the peak levels  
263 generated through initial immunization by 5-fold and upwards of 20-fold respectively (Fig. 7B  
264 and S2). Unsurprisingly, the greatest increase from pre-challenge neutralization was against the  
265 P.1 challenge isolate. Group A showed slightly higher P.1 NtAbs compared to Group B and C  
266 macaques and was the only group to have significantly higher titers across different variants.  
267 The lower degree of histopathology seen in Groups B and C may indicate that 25 µg S with  
268 either form of CoVaccine HT™ provides greater long-term protection. In Group D control  
269 macaques, P.1 challenge generated low levels of NtAbs compared to immunization alone, and it  
270 was only cross-reactive with the B.1.351 isolate and not to WA1/2020 nor B.1.617 isolates.  
271 This suggests that primary infection with one isolate of SARS-CoV-2 does not generate broad  
272 immunity against other variants in contrast to vaccine derived immunity, which is more broadly  
273 cross-reactive with VOCs, even months after peak immunity is observed.

274

## 275 **DISCUSSION**

276 Understanding the durability and breadth of vaccine-generated immunity is critical for predicting  
277 long-term protection during the COVID-19 pandemic and for informing policy on strategic  
278 resource deployment to facilitate equitable vaccine access. Diversifying the type of vaccines  
279 currently used beyond mRNA and viral vectors to include other vaccine platforms, such as  
280 protein subunit vaccines, can bolster global availability by mobilizing more thermostable  
281 vaccines to resource-poor areas, or overcoming anti-vector immunity and adverse effects, by  
282 using this platform as a booster to restore pre-existing natural or vaccine-induced immunity (65-  
283 67).

284

285 We have demonstrated that two doses of a subunit vaccine consisting of a prefusion S trimer  
286 (Wuhan-Hu-1) formulated with liquid or lyophilized CoVaccine HT™ reduces viral load and

287 provides sufficient, durable, cross-variant protection from mild to moderate disease lasting at  
288 least 3 months after the final boost. This supports previous findings in rhesus macaques that S  
289 trimer-based subunit protein vaccines are highly immunogenic and generate long-lasting, robust  
290 antibody responses (68). Furthermore, using a two-step purification method of immunoaffinity  
291 chromatography followed by a size-exclusion polishing step results in a homogenous antigen  
292 composition and reduces host-cell carryover plaguing conventional purification strategies for  
293 protein subunits (69). Also promising is the prospect that the adjuvant, CoVaccine HT™, can be  
294 lyophilized, and reconstituted simply with water for injection and still retain functionality. This  
295 technology has been previously used to develop mono- and multivalent filovirus vaccine  
296 formulations. Those studies demonstrated that single-vial, lyophilized formulations  
297 preserved the higher order antigen structure and the biophysical properties of the adjuvant (70,  
298 71). Robust levels of S-specific IgG and homologous, as well as B.1.351, P.1 and B.1.617  
299 cross-neutralizing antibodies, were detected throughout the extended study period and inversely  
300 correlate with viral load and lung damage. This report supports growing evidence that the  
301 Wuhan-Hu-1 S peptide sequence encoded by highly effective mRNA, viral vectored, and  
302 subunit protein vaccines, generates immunity that affords protection against circulating VOCs  
303 (45, 46, 70-73), even months after the final vaccine dose when antibody titers are waning.  
304 Furthermore, we noticed a few macaques receiving the higher antigen dose had developed  
305 increasingly potent cross-variant neutralizing titers immediately prior to viral challenge which  
306 were greater than titers observed during the peak humoral response. This suggests that a  
307 potentially remaining antigen depot or persistence of APC's may foster continued accumulation  
308 of somatic mutations and affinity maturation in memory B cells (74, 75) beyond the initial  
309 vaccination phase.

310

311 This study is also the first to describe the course of infection and histopathology of a SARS-

312 CoV-2 P.1 infection in a NHP model. Consistent with what was described in WA1/2020 infected

313 cynomolgus macaques (51, 52), macaques challenged with the P.1 isolate did not develop  
314 elevated temperature or decreased weight, nor did they show observable signs of respiratory  
315 disease. Viral load in the upper and lower respiratory tract peaked early during infection two  
316 days after challenge and gradually decreased to undetectable sgRNA levels by day 14 in  
317 unprotected animals, similar to viral kinetics described in another study using the same  
318 inoculating dose ( $1 \times 10^6$  TCID<sub>50</sub>), but with an early pandemic isolate (52). Although P.1 is  
319 estimated to be upwards of 2.4-fold more transmissible (76), it is unclear whether the higher  
320 viral load observed during peak P.1 replication in this study compared to time-matched reports  
321 for a non-variant isolate is a characteristic of P.1 replication or a discrepancy between readouts  
322 from different RT-PCR procedures. However, we show that immunization with both 5 and 25  $\mu$ g  
323 doses of S effectively reduces viral load in both upper and lower respiratory tracts implying a  
324 lower likelihood of viral transmission even in mildly symptomatic macaques. Histopathological  
325 examination of lung and bronchial sections in unprotected macaques confirmed mild to  
326 moderate disease, which was abrogated in immunized individuals. COVID-19 like disease  
327 observed in this model consisted of increased intraalveolar and interstitial infiltration, as well as  
328 giant syncytial cells, similar to previous observations (51, 77, 78). While both high and low  
329 doses of S antigen generate statistically negligible differences in humoral responses during  
330 peak immunity, it is clear from our findings that higher antigen doses, at least with CoVaccine  
331 HT<sup>TM</sup> produces a more durable and protective response at this later timepoint.

332

333 Late P.1 challenge induced an anamnestic response in all immunized macaques that restored  
334 S-specific antibody titers to peak serum concentrations seen shortly after the final boost, and  
335 significantly enhanced vaccine-matched and VOC-neutralizing antibody titers. In most  
336 macaques receiving 25  $\mu$ g S, the immune recall occurred with little to no disease. The durability  
337 and cross-variant neutralizing nature of immune responses generated by mRNA and viral  
338 vectors has been documented up to six months or later (79-82). However, breakthrough

339 infections, particularly with variant strains, have been reported even in the presence of  
340 detectable and high-level NtAbs (54, 56, 59, 83). Anamnestic responses in fully immunized  
341 NHPs have been characterized previously with homologous and B.1.351 variant challenge and  
342 agree with our observations that viral challenge boosts functional antibody levels. Our analysis  
343 shows that viral challenge with a heterologous strain not only rapidly boosts homologous and  
344 challenge strain specific NtAbs, but also NtAbs against the unencountered variants, B.1.351 and  
345 B.1.617, underpinning the broad-spectrum potential of subunit protein vaccines. In contrast,  
346 control macaques, receiving no S antigen, developed moderate levels of P.1 NtAbs that are only  
347 cross-neutralizing with B.1.351, and barely neutralize WA1/2020 and B.1.617, suggesting that  
348 natural infection with one strain of SARS-CoV-2 may confer only limited protection against other  
349 VOCs. Of course, further affinity maturation could not be observed here as the study ended 14  
350 days after challenge.

351  
352 The small size of our treatment groups (n=3) is a limitation of our study and may therefore not  
353 provide enough statistical power to strongly correlate antibody concentrations to viral load or  
354 histopathology score. Furthermore, we cannot directly compare the outcome of our study to  
355 other studies that evaluate vaccine efficacy soon after the final booster when immunity is  
356 greatest, as vaccine efficacy is known to decline over time. Likewise, we could not benchmark  
357 the efficacy of our vaccine formulation when the immunity is greatest at week 5, however, our  
358 late challenge scheme accurately reflects the current urgent need for decisions about timing and  
359 candidates for possible booster vaccinations during the pandemic situation as it provides useful  
360 information regarding the real-life durability and breadth of vaccine protection. It furthermore  
361 may shed light into the utility of protein vaccines to serve as prime or boost in combination with  
362 other vaccines.

363

364 In conclusion, we show that a two-dose regimen of a prefusion-stabilized trimeric S subunit  
365 protein vaccine formulated with lyophilizable CoVaccine HT™ adjuvant reduces viral burden and  
366 high antigen doses can confer durable cross-variant immunity. Future efforts will therefore focus  
367 on developing a thermostabilized vaccine formulation in a single-vial presentation, potentially  
368 enabling facile worldwide distribution.

369

## 370 **MATERIALS AND METHODS**

### 371 **Ethical Statement**

372 The investigators adhered fully to the “Guide for the Care and Use of Laboratory Animals” by  
373 the Committee on Care of Laboratory Animal Resources Commission on Life Sciences, National  
374 Research Council. Cynomolgus macaques (*Macaca fascicularis*) were housed at BIOQUAL Inc.  
375 (Rockville, MD). All macaque experiments were reviewed and approved by BIOQUAL's Animal  
376 Care and Use Committee. BIOQUAL Inc. is accredited by the American Association for  
377 Accreditation of Laboratory Animal Care (AAALAC).

378

379 **Study Design** Cynomolgus macaque studies were performed using three adjuvanted vaccine  
380 formulations and an adjuvanted control using unrelated antigens: A) 5 µg of SARS-CoV-2 S  
381 protein with 10 mg lyophilized CoVaccine HT™, B) 25 µg S protein with 10 mg liquid CoVaccine  
382 HT™, C) 25 µg S protein with 10 mg lyophilized CoVaccine HT™, and D) 25 µg of Ebola Virus  
383 (EBOV) glycoprotein with 10 mg CoVaccine HT™, co-lyophilized in one vial. CoVaccine HT™  
384 (BTG International Ltd, London, United Kingdom) was lyophilized as previously described (71)  
385 and reconstituted with sterile PBS before mixing with the antigen. Each group consisted of both  
386 male and female cynomolgus macaques ( $n = 3$  for each formulation) weighing between 2.8 and  
387 8.2 kg. Cynomolgus macaques of groups A-C were immunized intramuscularly (IM) in both  
388 deltoids (split dose) at weeks 0 and 3, control animals were immunized only once at week 0.  
389 Pre-challenge sera were collected at weeks 0, 3, 5, 6, 15. Challenge at week 15 with SARS-

390 CoV-2 P.1 variant, hCoV-19/Japan/TY7-501/2021, TY7-501 (BIOQUAL-generated stock [lot no.  
391 031921-1215] in Calu-3 cells from seed stock no.TY7-501 was performed with an inoculum  
392 dose of  $5 \times 10^5$  TCID<sub>50</sub>/mL administered to each animal in volumes of 1 mL by intratracheal and  
393 intranasal injection at each site. Nasal and oral swabs (NS and OS respectively) were collected  
394 on days 2, 4, 7, 10 and 14 after challenge. Bronchoalveolar lavage (BAL) samples were  
395 collected on days 2, 4, 7 and 10 after challenge. Necropsies and lung tissue collection were  
396 performed at the endpoint of the study at day 14 post-challenge. Samples were immediately  
397 processed and subsequently stored at  $-80^\circ\text{C}$  prior to analysis. S-specific serum IgG  
398 concentrations were determined using a microsphere immunoassay (MIA; see below). NtAbs  
399 were measured using wild-type and rVSV-SARS-CoV-2 S PRNTs (see below). Viral load in the  
400 NS, OS and BAL was measured using plaque assays and quantification of genomic and  
401 subgenomic N transcript RNA (see below). Lung and bronchi tissues were processed, and H&E  
402 stained to delineate histopathological signs of disease in each animal.

403

#### 404 **Recombinant protein expression and purification**

405 Plasmids were generated to express the pre-fusion, protease-resistant, trimeric transmembrane  
406 (TM)-deleted spike (S) glycoprotein from SARS-CoV-2 as described previously (53).  
407 Modifications to the gene include the removal of the furin and S2' cleavage site, the addition of 2  
408 prolines between the heptad repeat 1 and central helix region, and a foldon trimerization  
409 domain. A stably transformed cell line was created by hygromycin B selection at  $300 \mu\text{g/mL}$ .  
410 The cell line was scaled up to 1L using a WAVE bioreactor (Cytiva, Marlborough, MA) and  
411 induced with  $200 \mu\text{M}$   $\text{CuSO}_4$ .

412

413 Recombinant S protein was purified from clarified cell culture supernatants by immunoaffinity  
414 chromatography (IAC) using the SARS-CoV-2 cross-reactive mAb CR3022 (provided by Mapp  
415 Biopharmaceutical) coupled to NHS-activated Sepharose at a concentration of  $10 \text{ mg/mL}$ . The



416 antigen was eluted with a glycine buffer (pH 2) in tandem into a HiPrep 26/10 desalting column  
417 (Cytiva, Marlborough, MA) equilibrated with PBS. The oligomeric content was evaluated by size-  
418 exclusion chromatography using a HiLoad 16/600 column (GE Healthcare, Piscataway, NJ)  
419 equilibrated with PBS. The S protein eluted as a single peak and the final product migrated as  
420 two bands, corresponding to the monomer and trimer on SDS-PAGE, under denaturing  
421 conditions, and was reactive to CR3022 mAb on a western blot. Antigens were sterile filtered  
422 with a 0.22  $\mu\text{m}$  syringe filter (Cytiva, Marlborough, MA) and stored at  $-80^{\circ}\text{C}$  until use.

423

#### 424 **Analysis of antibodies by multiplex microsphere immunoassay (MIA)**

425 The IgG antibody titers in sera were measured using a multiplex microsphere-based  
426 immunoassay as described previously (53, 84-86). Spectrally distinct, magnetic MagPlex®  
427 microspheres (Luminex Corporation, Austin, TX) were coupled to purified S, RBD or bovine  
428 serum albumin (BSA). A mixture of the antigen-coupled beads was incubated with sera diluted  
429 with PBS+ 1% BSA and 0.02% Tween 20 (PBS-BT) at 1:5,000 or 1:10,000 in black-sided 96-  
430 well plates for 3 hours at  $37^{\circ}\text{C}$  with agitation. Bound IgG was detected using  $1\mu\text{g}/\text{mL}$  red  
431 phycoerythrin (R-PE)-conjugated goat anti-human IgG antibodies (Jackson ImmunoResearch,  
432 Inc., West Grove, PA) and resuspended in MAGPIX® drive fluid before being analyzed on a  
433 MAGPIX® Instrument (Luminex Corporation, Austin, TX).

434

435 To determine S-specific IgG concentrations in the sera, the median fluorescence intensity (MFI)  
436 readouts of each sample was interpolated against a standard curve generated using purified  
437 human IgG at concentrations in the range of 7.44 to 1000 ng/mL. To produce the antibody  
438 standard, IgG was purified from pooled sera of COVID-19 vaccinated human volunteers using  
439 protein A affinity chromatography, followed by immunoaffinity chromatography (IAC) using NHS-  
440 Sepharose (Cytiva, Marlborough, MA) coupled with recombinant S to select for S-specific IgG.  
441 Purity was assessed using SDS-PAGE and antibody concentration was quantified using  $\text{UV}_{280}$

442 absorbance. The resulting MFI values were plotted against the Log<sub>10</sub>-transformed  
443 concentrations and fitted using a sigmoidal dose-response, variable slope model (GraphPad  
444 Prism, San Diego, CA). The resulting curves yielded  $r^2$  values > 0.99 with a well-defined top and  
445 bottom and the linear range of the curve. The experimental S-specific IgG concentrations in  
446 experimental samples were determined by interpolation on the standard curves, multiplied by  
447 the dilution factors and plotted as antibody concentrations (ng/mL).

448

#### 449 **Recombinant vesicular stomatitis virus (rVSV) neutralization assay**

450 Replication-competent rVSV expressing SARS-CoV-2 S protein (Wuhan-Hu-1) was generated  
451 as described previously (87) and the virus stocks were amplified in Vero E6 cells. For the  
452 plaque reduction neutralization test (PRNT), individual NHP serum samples were heat-  
453 inactivated at 56°C for 30 minutes. Six 3-fold serial dilutions of serum samples, starting at 1:40  
454 dilution, were prepared and incubated with 100 plaque-forming units (PFU) of rVSV-SARS-CoV-  
455 2-S at 37°C for 1 hour. Antibody-virus complexes were added to Vero cell monolayers in 6-well  
456 plates and incubated at 37°C for another hour followed by addition of overlay media mixed with  
457 1% agarose. 72 hours later, cells were fixed and stained with a solution containing 1%  
458 formaldehyde, 1% methanol, and 0.05% crystal violet overnight for plaque enumeration.  
459 Neutralization titers (PRNT<sub>50</sub>) were generated using a variable slope, nonlinear regression, with  
460 upper and lower constraints (100% and 0% neutralization, respectively), using Prism 9  
461 (GraphPad Software, San Diego, CA).

462

#### 463 **TCID<sub>50</sub> and Wild-type SARS-CoV-2 virus PRNT<sub>50</sub> assay**

464 TCID<sub>50</sub> and PRNT<sub>50</sub> assays were performed in a biosafety level 3 facility at BIOQUAL, Inc.  
465 (Rockville, MD). The TCID<sub>50</sub> assay was conducted by addition of 10-fold graded dilutions of  
466 samples to Vero TMPRSS2 cell monolayers. Serial dilutions were performed in the cell culture  
467 wells in quadruplicates. Positive (virus stock of known infectious titer in the assay) and negative

468 (medium only) control wells were included in each assay set-up. The plates were incubated at  
469 37°C, 5.0% CO<sub>2</sub> for 4 days. The cell monolayers were visually inspected for CPE, i.e. complete  
470 destruction of the monolayer with cellular agglutination. The TCID<sub>50</sub> value was calculated using  
471 the Read-Muench formula (88). For samples which had less than 3 CPE positive wells, the  
472 TCID<sub>50</sub> could not be calculated using the Reed-Muench formula, and these samples were  
473 assigned a titer of below the limit of detection (i.e., <2.7 log<sub>10</sub> TCID<sub>50</sub>/mL). For optimal assay  
474 performance, the TCID<sub>50</sub> value of the positive control should test within 2-fold of the expected  
475 value.

476

477 To measure neutralization, sera from each NHP were diluted to 1:10 followed by a 3 fold- serial  
478 dilution. Diluted samples were then incubated with 30 plaque-forming units of wild-type SARS-  
479 CoV-2 USA-WA1/2020 (BEI-NR-52281), B.1.351 (BEI NR-55282), or P.1. (BEI NR-54982)  
480 variants, in an equal volume of culture medium for 1 hour at 37°C. The serum-virus mixtures  
481 were added to a monolayer of confluent Vero E6 cells and incubated for one hour at 37°C in 5%  
482 CO<sub>2</sub>. Each well was then overlaid with culture medium containing 0.5% methylcellulose and  
483 incubated for 3 days at 37°C in 5% CO<sub>2</sub>. The plates were then fixed with methanol at -20°C for  
484 30 minutes and stained with 0.2% crystal violet for 30 min at room temperature. PRNT<sub>50</sub> titers  
485 were calculated using a variable slope, nonlinear regression, with upper and lower constraints  
486 (100% and 0% neutralization, respectively), on Prism 9 (Graphpad Software, San Diego, CA).

487

## 488 **Histopathology**

489 NHP Lung tissue specimens from each lung lobe and bronchi were harvested at time of  
490 necropsy and preserved in 10% formalin before processing and parafilm embedded, fixed and  
491 stained with hematoxylin & eosin. For each NHP, one section from the bronchi and one section  
492 from each lobe on the right and left lung were selected for scoring, for a total of six sections.  
493 Pathologic findings on each slide were scored on a scale of 0 – 2 for intraalveolar edema, the

494 amount of BALT (bronchiolar-associated lymphoid tissue), and the presence of Interstitial  
495 inflammation; and 0 – 3 for perivascular inflammatory infiltrates (cuffing), and intraalveolar  
496 inflammation. (See Table S1.) Scores for the six slides from each macaque were tabulated, and  
497 a cumulative average score was calculated for each NHP using a total of 30 scores as  
498 replicates.

499

#### 500 **SARS-CoV-2 Viral Genomic and subgenomic RNA quantitative RT-PCR**

501 The presence of viral RNA and viral replication in the BAL, NS, and OS after SARS-CoV-2 P.1  
502 strain challenge was determined by quantitative RT-PCR. RNA was isolated from 200  $\mu$ L  
503 sample using the QIAamp MinElute Virus spin kit (Qiagen, Frederick, MD). For the qRT-PCR  
504 assay, viral RNA was first isolated from BAL, NS and OS using the Qiagen MinElute virus spin  
505 kit. To generate a control for the amplification reaction, RNA was isolated from the applicable  
506 virus stock using the same procedure. The number of copies for the control were calculated  
507 using known RNA weights per mol. A master mix was prepared containing Taq-polymerase,  
508 obtained from the TaqMan RT-PCR kit (Bioline cat# BIO-78005), RT, RNase inhibitor, a primer  
509 pair at 2  $\mu$ M concentration (2019-nCoV\_N1-F: 5'-GAC CCC AAA ATC AGC GAA AT-3' and  
510 2019-nCoV\_N1-R: 5'-TCT GGT TAC TGC CAG TTG AAT CTG-3') and probe (2019-nCoV\_N1-  
511 P: 5'-FAM-ACC CCG CAT TAC GTT TGG TGG ACC-BHQ1-3') at a concentration of 2  $\mu$ M. For  
512 the reactions, 45  $\mu$ L of the master mix and 5  $\mu$ L of the sample RNA were added to the wells of a  
513 96-well plate. All samples were tested in triplicate. Control RNA was prepared to contain  $10^6$  to  
514  $10^7$  copies per 3  $\mu$ L. Eight (8) 10-fold serial dilutions of control RNA were prepared and  
515 produced a standard curve with a range of 1 to  $10^7$  copies/reaction. For amplification, the plate  
516 was placed in an Applied Biosystems 7500 Sequence detector and amplified using the following  
517 program: 48°C for 30 minutes, 95°C for 10 minutes followed by 40 cycles of 95°C for 15  
518 seconds, and 1 minute at 55°C. Duplicate samples of each dilution were prepared as described  
519 above. If the copy number exceeded the upper detection limit, the sample was diluted as

520 needed. The number of copies of RNA per mL was calculated by interpolation from the standard  
521 curve and multiplying by the reciprocal of 0.2 mL extraction volume. This gave a practical range  
522 of 50 to  $5 \times 10^8$  RNA copies per mL for BAL samples and for nasal and oral swabs the viral  
523 loads were given per swab.

524

525 The RT-PCR assay for the sgRNA utilizes primers and a probe specifically designed to amplify  
526 and bind to a region of the N gene mRNA from the Coronavirus, which is not packaged into the  
527 virion. The signal was compared to a known standard curve of plasmid containing the sequence  
528 of part of the messenger RNA and calculated to give copies per ml. The control DNA was  
529 prepared to contain  $10^7$  copies. Seven 10-fold serial dilutions of control RNA were prepared  
530 using Buffer AVE and generated a standard curve with a range of 1 to  $10^6$  copies/reaction.  
531 Duplicate samples of each dilution were prepared as described above with the primer pair (SG-  
532 N-F: CGATCTCTTGTAGATCTGTTCTC and SG-N-R: GGTGAACCAAGACG CAGTAT) and  
533 probe (FAM- TAACCAGAATGGAGAACGCAGTGGG -BHQ). If the copy number exceeded the  
534 upper detection limit, the sample was diluted as needed. For amplification, the plate was placed  
535 in an Applied Biosystems 7500 Sequence detector and amplified using the following program:  
536 48°C for 30 minutes, 95°C for 10 minutes followed by 40 cycles of 95°C for 15 seconds, and 1  
537 minute at 55°C. The number of copies of RNA per ml was calculated by interpolation from the  
538 standard curve and multiplying by the reciprocal of 0.2 ml extraction volume. This gave a  
539 practical range of 50 to  $5 \times 10^7$  RNA copies per mL for harvested samples.

540

#### 541 **Statistical analysis**

542 Statistically significant differences between the geometric mean of IgG concentrations or MFI in  
543 groups given different vaccine formulations at each timepoint were determined using a two-way  
544 ANOVA followed by Dunnett's Multiple Comparison. Comparisons of PRNT<sub>50</sub> values between  
545 vaccine formulations was done using a Kruskal-Wallis Test followed by a Dunn's multiple

546 comparisons test. Correlations between IgG or PRNT titers to viral load in the BAL and NS was  
547 examined using the non-parametric Spearman's correlation test. Differences between  
548 histopathological scores in different treatment groups was calculated using a one-way ANOVA  
549 followed by Dunnett's multiple comparison test with the cumulative scores of all slides per  
550 macaque as replicates. All statistical analysis was completed using Graphpad Prism 9 software  
551 (San Diego, CA).

552

### 553 **Supplementary Materials**

554 Fig. S1. Serum Wuhan-Hu-1 RBD-Specific IgG Kinetics

555 Fig S2. Pre-and Post-Challenge rVSV-SARS-CoV2-S Neutralizing Antibody Response

556 Fig S3. Individual TCID<sub>50</sub> Viral load from the BAL and NS

557 Fig S4. Individual Genomic Viral RNA Load

558 Fig S5. Individual Subgenomic N transcript RNA Load

559 Table S1 Detailed Histopathology Scoring System

560

### 561 **References:**

562 1. P. Zhou *et al.*, A pneumonia outbreak associated with a new coronavirus of probable bat  
563 origin. *Nature* **579**, 270-273 (2020).

564 2. N. Zhu *et al.*, A Novel Coronavirus from Patients with Pneumonia in China, 2019. *The*  
565 *New England journal of medicine* **382**, 727-733 (2020).

566 3. S. Garg *et al.*, Critical interpretative synthesis of herd immunity for COVID-19 pandemic.  
567 *J Family Med Prim Care* **10**, 1117-1123 (2021).

568 4. C. Huang *et al.*, Clinical features of patients infected with 2019 novel coronavirus in  
569 Wuhan, China. *Lancet* **395**, 497-506 (2020).

570 5. Z. Wu, J. M. McGoogan, Characteristics of and Important Lessons From the Coronavirus  
571 Disease 2019 (COVID-19) Outbreak in China: Summary of a Report of 72314 Cases

- 572 From the Chinese Center for Disease Control and Prevention. *Jama* **323**, 1239-1242  
573 (2020).
- 574 6. J. Helms *et al.*, Neurologic Features in Severe SARS-CoV-2 Infection. *The New England*  
575 *journal of medicine* **382**, 2268-2270 (2020).
- 576 7. M. Levi, J. Thachil, T. Iba, J. H. Levy, Coagulation abnormalities and thrombosis in  
577 patients with COVID-19. *Lancet Haematol* **7**, e438-e440 (2020).
- 578 8. R. Mao *et al.*, Manifestations and prognosis of gastrointestinal and liver involvement in  
579 patients with COVID-19: a systematic review and meta-analysis. *Lancet Gastroenterol*  
580 *Hepatol* **5**, 667-678 (2020).
- 581 9. S. Richardson *et al.*, Presenting Characteristics, Comorbidities, and Outcomes Among  
582 5700 Patients Hospitalized With COVID-19 in the New York City Area. *Jama* **323**, 2052-  
583 2059 (2020).
- 584 10. Y. Bai *et al.*, Presumed Asymptomatic Carrier Transmission of COVID-19. *Jama* **323**,  
585 1406-1407 (2020).
- 586 11. T. Ganyani *et al.*, Estimating the generation interval for coronavirus disease (COVID-19)  
587 based on symptom onset data, March 2020. *Euro Surveill* **25**, (2020).
- 588 12. X. He *et al.*, Temporal dynamics in viral shedding and transmissibility of COVID-19. *Nat*  
589 *Med* **26**, 672-675 (2020).
- 590 13. Z. He *et al.*, Seroprevalence and humoral immune durability of anti-SARS-CoV-2  
591 antibodies in Wuhan, China: a longitudinal, population-level, cross-sectional study.  
592 *Lancet* **397**, 1075-1084 (2021).
- 593 14. F. J. Ibarondo *et al.*, Rapid Decay of Anti-SARS-CoV-2 Antibodies in Persons with Mild  
594 Covid-19. *The New England journal of medicine* **383**, 1085-1087 (2020).
- 595 15. L. B. Rodda *et al.*, Functional SARS-CoV-2-Specific Immune Memory Persists after Mild  
596 COVID-19. *Cell* **184**, 169-183 e117 (2021).

- 597 16. D. S. Khoury *et al.*, Neutralizing antibody levels are highly predictive of immune  
598 protection from symptomatic SARS-CoV-2 infection. *Nat Med* **27**, 1205-1211 (2021).
- 599 17. J. Seow *et al.*, Longitudinal observation and decline of neutralizing antibody responses  
600 in the three months following SARS-CoV-2 infection in humans. *Nat Microbiol* **5**, 1598-  
601 1607 (2020).
- 602 18. A. K. Wheatley *et al.*, Evolution of immune responses to SARS-CoV-2 in mild-moderate  
603 COVID-19. *Nat Commun* **12**, 1162 (2021).
- 604 19. V. Gupta *et al.*, Asymptomatic reinfection in two healthcare workers from India with  
605 genetically distinct SARS-CoV-2. *Clin Infect Dis*, (2020).
- 606 20. D. Harrington *et al.*, Confirmed Reinfection with SARS-CoV-2 Variant VOC-202012/01.  
607 *Clin Infect Dis*, (2021).
- 608 21. D. Loconsole *et al.*, Symptomatic SARS-CoV-2 Reinfection in a Healthy Healthcare  
609 Worker in Italy Confirmed by Whole-Genome Sequencing. *Viruses* **13**, (2021).
- 610 22. B. Prado-Vivar *et al.*, A case of SARS-CoV-2 reinfection in Ecuador. *Lancet Infect Dis*  
611 **21**, e142 (2021).
- 612 23. R. L. Tillett *et al.*, Genomic evidence for reinfection with SARS-CoV-2: a case study.  
613 *Lancet Infect Dis* **21**, 52-58 (2021).
- 614 24. B. A. Johnson *et al.*, Loss of furin cleavage site attenuates SARS-CoV-2 pathogenesis.  
615 *Nature* **591**, 293-299 (2021).
- 616 25. J. A. Plante *et al.*, Spike mutation D614G alters SARS-CoV-2 fitness. *Nature* **592**, 116-  
617 121 (2021).
- 618 26. N. R. Faria *et al.*, Genomics and epidemiology of the P.1 SARS-CoV-2 lineage in  
619 Manaus, Brazil. *Science (New York, N.Y.)* **372**, 815-821 (2021).
- 620 27. P. Mlcochova *et al.*, SARS-CoV-2 B.1.617.2 Delta variant replication and immune  
621 evasion. *Nature*, (2021).



- 622 28. E. C. Sabino *et al.*, Resurgence of COVID-19 in Manaus, Brazil, despite high  
623 seroprevalence. *Lancet* **397**, 452-455 (2021).
- 624 29. FDA. (<https://www.fda.gov/media/145802/download>., 2021).
- 625 30. Z. Wang *et al.*, mRNA vaccine-elicited antibodies to SARS-CoV-2 and circulating  
626 variants. *Nature* **592**, 616-622 (2021).
- 627 31. T. T. Brehm *et al.*, SARS-CoV-2 Reinfection in a Healthcare Worker Despite the  
628 Presence of Detectable Neutralizing Antibodies. *Viruses* **13**, (2021).
- 629 32. C. M. Romano *et al.*, SARS-CoV-2 reinfection caused by the P.1 lineage in Araraquara  
630 city, Sao Paulo State, Brazil. *Rev Inst Med Trop Sao Paulo* **63**, e36 (2021).
- 631 33. M. S. D. Silva *et al.*, Early detection of SARS-CoV-2 P.1 variant in Southern Brazil and  
632 reinfection of the same patient by P.2. *Rev Inst Med Trop Sao Paulo* **63**, e58 (2021).
- 633 34. N. Zucman, F. Uhel, D. Descamps, D. Roux, J. D. Ricard, Severe reinfection with South  
634 African SARS-CoV-2 variant 501Y.V2: A case report. *Clin Infect Dis*, (2021).
- 635 35. T. Charmet *et al.*, Impact of original, B.1.1.7, and B.1.351/P.1 SARS-CoV-2 lineages on  
636 vaccine effectiveness of two doses of COVID-19 mRNA vaccines: Results from a  
637 nationwide case-control study in France. *Lancet Reg Health Eur* **8**, 100171 (2021).
- 638 36. M. Imai *et al.*, Characterization of a new SARS-CoV-2 variant that emerged in Brazil.  
639 *Proceedings of the National Academy of Sciences of the United States of America* **118**,  
640 (2021).
- 641 37. P. Wang *et al.*, Increased resistance of SARS-CoV-2 variant P.1 to antibody  
642 neutralization. *Cell host & microbe* **29**, 747-751 e744 (2021).
- 643 38. FDA. (Food and Drug Administration [https://www.fda.gov/emergency-preparedness-and-  
644 response/coronavirus-disease-2019-covid-19/pfizer-biontech-covid-19-vaccine](https://www.fda.gov/emergency-preparedness-and-response/coronavirus-disease-2019-covid-19/pfizer-biontech-covid-19-vaccine)., 2021),  
645 vol. 2021.

- 646 39. FDA. (U.S, Food and Drug Administration, <https://www.fda.gov/emergency->  
647 [preparedness-and-response/coronavirus-disease-2019-covid-19/moderna-covid-19-](https://www.fda.gov/emergency-preparedness-and-response/coronavirus-disease-2019-covid-19/moderna-covid-19-vaccine)  
648 [vaccine.](https://www.fda.gov/emergency-preparedness-and-response/coronavirus-disease-2019-covid-19/moderna-covid-19-vaccine), 2021), vol. 2021.
- 649 40. FDA. (Food and Drug Administration, <https://www.fda.gov/news-events/press->  
650 [announcements/fda-issues-emergency-use-authorization-third-covid-](https://www.fda.gov/news-events/press-announcements/fda-issues-emergency-use-authorization-third-covid-19-vaccine), 2021), vol. 2021.
- 651 41. L. A. Jackson *et al.*, An mRNA Vaccine against SARS-CoV-2 - Preliminary Report. *The*  
652 *New England journal of medicine* **383**, 1920-1931 (2020).
- 653 42. F. P. Polack *et al.*, Safety and Efficacy of the BNT162b2 mRNA Covid-19 Vaccine. *The*  
654 *New England journal of medicine* **383**, 2603-2615 (2020).
- 655 43. J. Sadoff *et al.*, Safety and Efficacy of Single-Dose Ad26.COV2.S Vaccine against  
656 Covid-19. *The New England journal of medicine*, (2021).
- 657 44. S. A. Madhi *et al.*, Efficacy of the ChAdOx1 nCoV-19 Covid-19 Vaccine against the  
658 B.1.351 Variant. *The New England journal of medicine* **384**, 1885-1898 (2021).
- 659 45. V. Shinde *et al.*, Efficacy of NVX-CoV2373 Covid-19 Vaccine against the B.1.351  
660 Variant. *The New England journal of medicine* **384**, 1899-1909 (2021).
- 661 46. P. Jalkanen *et al.*, COVID-19 mRNA vaccine induced antibody responses against three  
662 SARS-CoV-2 variants. *Nat Commun* **12**, 3991 (2021).
- 663 47. J. Liu *et al.*, BNT162b2-elicited neutralization of B.1.617 and other SARS-CoV-2  
664 variants. *Nature*, (2021).
- 665 48. A. Muik *et al.*, Neutralization of SARS-CoV-2 lineage B.1.1.7 pseudovirus by BNT162b2  
666 vaccine-elicited human sera. *Science (New York, N.Y.)* **371**, 1152-1153 (2021).
- 667 49. P. Supasa *et al.*, Reduced neutralization of SARS-CoV-2 B.1.1.7 variant by  
668 convalescent and vaccine sera. *Cell* **184**, 2201-2211 e2207 (2021).
- 669 50. L. A. Hilgers, A. G. Blom, Sucrose fatty acid sulphate esters as novel vaccine adjuvant.  
670 *Vaccine* **24 Suppl 2**, S2-81-82 (2006).

- 671 51. F. J. Salguero *et al.*, Comparison of rhesus and cynomolgus macaques as an infection  
672 model for COVID-19. *Nat Commun* **12**, 1260 (2021).
- 673 52. B. Rockx *et al.*, Comparative pathogenesis of COVID-19, MERS, and SARS in a  
674 nonhuman primate model. *Science (New York, N.Y.)* **368**, 1012-1015 (2020).
- 675 53. C. Y. Lai *et al.*, Recombinant protein subunit SARS-CoV-2 vaccines formulated with  
676 CoVaccine HT adjuvant induce broad, Th1 biased, humoral and cellular immune  
677 responses in mice. *bioRxiv : the preprint server for biology*, (2021).
- 678 54. A. Baj *et al.*, Breakthrough Infections of E484K-Harboring SARS-CoV-2 Delta Variant,  
679 Lombardy, Italy. *Emerging infectious diseases* **27**, (2021).
- 680 55. M. Bergwerk *et al.*, Covid-19 Breakthrough Infections in Vaccinated Health Care  
681 Workers. *The New England journal of medicine*, (2021).
- 682 56. E. Hacisuleyman *et al.*, Vaccine Breakthrough Infections with SARS-CoV-2 Variants.  
683 *The New England journal of medicine* **384**, 2212-2218 (2021).
- 684 57. I. Kroidl *et al.*, Vaccine breakthrough infection and onward transmission of SARS-CoV-2  
685 Beta (B.1.351) variant, Bavaria, Germany, February to March 2021. *Euro Surveill* **26**,  
686 (2021).
- 687 58. T. Kustin *et al.*, Evidence for increased breakthrough rates of SARS-CoV-2 variants of  
688 concern in BNT162b2-mRNA-vaccinated individuals. *Nat Med* **27**, 1379-1384 (2021).
- 689 59. N. Vignier *et al.*, Breakthrough Infections of SARS-CoV-2 Gamma Variant in Fully  
690 Vaccinated Gold Miners, French Guiana, 2021. *Emerging infectious diseases* **27**,  
691 (2021).
- 692 60. C. M. Brown *et al.*, Outbreak of SARS-CoV-2 Infections, Including COVID-19 Vaccine  
693 Breakthrough Infections, Associated with Large Public Gatherings - Barnstable County,  
694 Massachusetts, July 2021. *MMWR Morb Mortal Wkly Rep* **70**, 1059-1062 (2021).
- 695 61. M. D. Fahlberg *et al.*, Cellular events of acute, resolving or progressive COVID-19 in  
696 SARS-CoV-2 infected non-human primates. *Nat Commun* **11**, 6078 (2020).

- 697 62. M. Guebre-Xabier *et al.*, NVX-CoV2373 vaccine protects cynomolgus macaque upper  
698 and lower airways against SARS-CoV-2 challenge. *Vaccine* **38**, 7892-7896 (2020).
- 699 63. C. Woolsey *et al.*, Establishment of an African green monkey model for COVID-19.  
700 *bioRxiv : the preprint server for biology*, (2020).
- 701 64. M. Bergwerk *et al.*, Covid-19 Breakthrough Infections in Vaccinated Health Care  
702 Workers. *The New England journal of medicine*, (2021).
- 703 65. A. M. Chmielewska *et al.*, Combined adenovirus vector and hepatitis C virus envelope  
704 protein prime-boost regimen elicits T cell and neutralizing antibody immune responses.  
705 *Journal of virology* **88**, 5502-5510 (2014).
- 706 66. J. A. Choi *et al.*, Cross-Protection against MERS-CoV by Prime-Boost Vaccination Using  
707 Viral Spike DNA and Protein. *Journal of virology* **94**, (2020).
- 708 67. S. C. Gilbert, T. Lambe, Recombinant protein vaccines against SARS-CoV-2. *Lancet*  
709 *Infect Dis*, (2021).
- 710 68. M. Mandolesi *et al.*, SARS-CoV-2 protein subunit vaccination of mice and rhesus  
711 macaques elicits potent and durable neutralizing antibody responses. *Cell Rep Med* **2**,  
712 100252 (2021).
- 713 69. P. A. Goepfert *et al.*, Safety and immunogenicity of SARS-CoV-2 recombinant protein  
714 vaccine formulations in healthy adults: interim results of a randomised, placebo-  
715 controlled, phase 1-2, dose-ranging study. *Lancet Infect Dis*, (2021).
- 716 70. K. B. Preston *et al.*, Preservation of Quaternary Structure in Thermostable, Lyophilized  
717 Filovirus Glycoprotein Vaccines: A Search for Stability-Indicating Assays. *J Pharm Sci*  
718 **109**, 3716-3727 (2020).
- 719 71. K. B. Preston *et al.*, Single-vial filovirus glycoprotein vaccines: Biophysical  
720 characteristics and immunogenicity after co-lyophilization with adjuvant. *Vaccine*,  
721 (2021).

- 722 72. G. Alter *et al.*, Immunogenicity of Ad26.COVS vaccine against SARS-CoV-2 variants in  
723 humans. *Nature*, (2021).
- 724 73. M. G. Joyce *et al.*, Efficacy of a Broadly Neutralizing SARS-CoV-2 Ferritin Nanoparticle  
725 Vaccine in Nonhuman Primates. *bioRxiv : the preprint server for biology*, (2021).
- 726 74. J. N. Purushotham, N. van Doremalen, V. J. Munster, SARS-CoV-2 vaccines:  
727 anamnestic response in previously infected recipients. *Cell Res* **31**, 827-828 (2021).
- 728 75. K. G. Sprenger, J. E. Louveau, P. M. Murugan, A. K. Chakraborty, Optimizing  
729 immunization protocols to elicit broadly neutralizing antibodies. *Proceedings of the*  
730 *National Academy of Sciences of the United States of America* **117**, 20077-20087  
731 (2020).
- 732 76. N. R. Faria *et al.*, Genomics and epidemiology of a novel SARS-CoV-2 lineage in  
733 Manaus, Brazil. *medRxiv*, (2021).
- 734 77. B. Salzberger *et al.*, Epidemiology of SARS-CoV-2. *Infection* **49**, 233-239 (2021).
- 735 78. J. Yu *et al.*, Protective efficacy of Ad26.COVS against SARS-CoV-2 B.1.351 in  
736 macaques. *Nature* **596**, 423-427 (2021).
- 737 79. D. H. Barouch *et al.*, Durable Humoral and Cellular Immune Responses Following  
738 Ad26.COVS Vaccination for COVID-19. *medRxiv*, (2021).
- 739 80. R. R. Goel *et al.*, mRNA Vaccination Induces Durable Immune Memory to SARS-CoV-2  
740 with Continued Evolution to Variants of Concern. *bioRxiv : the preprint server for biology*,  
741 (2021).
- 742 81. A. Pegu *et al.*, Durability of mRNA-1273 vaccine-induced antibodies against SARS-CoV-  
743 2 variants. *Science (New York, N.Y.)*, (2021).
- 744 82. A. T. Widge *et al.*, Durability of Responses after SARS-CoV-2 mRNA-1273 Vaccination.  
745 *The New England journal of medicine* **384**, 80-82 (2021).
- 746 83. N. E. Blachere, E. Hacısuleyman, R. B. Darnell, Vaccine Breakthrough Infections with  
747 SARS-CoV-2 Variants. Reply. *The New England journal of medicine* **385**, e7 (2021).

- 748 84. B. K. Haun *et al.*, CoVaccine HT adjuvant potentiates robust immune responses to  
749 recombinant SARS-CoV-2 Spike S1 immunisation. *bioRxiv : the preprint server for*  
750 *biology*, (2020).
- 751 85. A. To *et al.*, Recombinant Zika Virus Subunits Are Immunogenic and Efficacious in Mice.  
752 *mSphere* **3**, (2018).
- 753 86. M. Namekar, M. Kumar, M. O'Connell, V. R. Nerurkar, Effect of serum heat-inactivation  
754 and dilution on detection of anti-WNV antibodies in mice by West Nile virus E-protein  
755 microsphere immunoassay. *PloS one* **7**, e45851 (2012).
- 756 87. W. Furuyama *et al.*, Rapid protection from COVID-19 in nonhuman primates vaccinated  
757 intramuscularly but not intranasally with a single dose of a recombinant vaccine. *bioRxiv*  
758 *: the preprint server for biology*, (2021).
- 759 88. L. J. Reed, H. Muench, A simple method of estimating fifty percent end points. *American*  
760 *journal of epidemiology* **27**, 493-497 (1938).

761

762 **Acknowledgements:** We would like to thank Takaji Wakita, from the National Institute of  
763 Infectious Diseases, Japan, for the P.1 viral challenge strain, and Shelby O'Connor and John  
764 Baczenas from the University of Wisconsin-Madison, USA, for deep sequencing our inhouse  
765 viral stock. We also would like to thank Adrian Creanga from the Vaccine Research Center-  
766 NIAID, USA for the Vero TMRPSS2 cell line used in our TCID<sub>50</sub> and PRNT<sub>50</sub> assays, as well as  
767 Andrea Marzi, Laboratory of Virology, NIAID-NIH, USA, for the rVSV-SARS-CoV 2 virus stock  
768 used in our surrogate PRNT<sub>50</sub> assay. Furthermore, we would like to thank Melissa Hamilton, the  
769 study coordinator at Bioqual Inc., USA; Mapp Biopharmaceutical Inc, for the CR3022 mAb used  
770 for protein purification; BTG International Limited for the CoVaccine HT™ adjuvant, and Miyoko  
771 Bellinger and Kristen Ewall from the JABSOM Histocore for preparing lung tissue sections for  
772 histopathological analysis.

773

774 **Funding:** This work was supported by:

775 National Institute of Allergy and Infectious Diseases Grant R01AI132323 (ATL)

776 National Institute of Minority Health and Health Disparities Grant U54MD007601 (JRH)

777 National Institute of General Medical Sciences Grant P30GM114737 (RY)

778 Institutional funds from University of Hawai'i at Mānoa, BIOQUAL Inc. and Soligenix Inc.

779

780 **Author Contribution:**

781 Conceptualization: AT, MML, HA, OD, ATL

782 Methodology: AT, TSW, KT, LP, HA, CYL, ATL

783 Investigation: AT, TSW, KT, LP, JG, ND, AC, BN, ZF, AVR, JYO

784 Formal Analysis: AT, MML, KT, ATL

785 Visualization: AT, KT

786 Funding acquisition: OD, ATL

787 Project administration: HA, OD, ATL

788 Supervision: HA, OD, ATL

789 Writing – original draft: AT, KT, ATL

790 Writing – review & editing: AT, TSW, MML, KT, HA, OD, ATL

791

792 **Competing Interests:**

793 ATL and OD are named inventors on a patent application covering a recombinant subunit

794 vaccine for SARS-CoV-2. LP, JG, ND, AC, BN, ZF, AVR, JYO and HA are current employees of

795 BIOQUAL, Inc. OD is a current employee of Soligenix Inc. All other authors declare no

796 competing interests.

797

798 **Data and material availability:** All data are available in the main text or the supplementary

799 materials

800

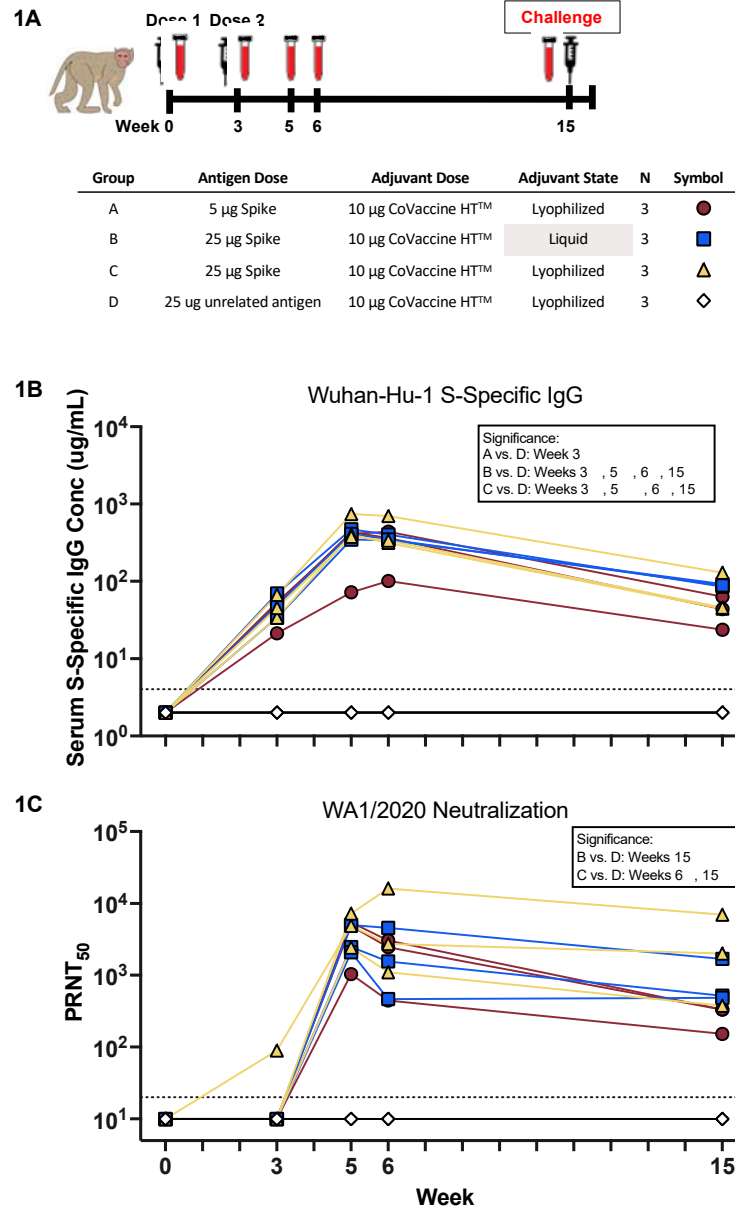

**Figure 1. Vaccine Scheme, IgG and Neutralizing Antibody Kinetics** (A) 12 cynomolgus macaques were separated into 4 groups and given either 5 or 25 µg S protein formulated with either liquid or reconstituted, lyophilized CoVaccine HT™ adjuvant. Two doses were administered IM 3 weeks apart and sera was collected at indicated time points. Macaques were challenged IN and IT with a total of  $1 \times 10^6$  TCID<sub>50</sub> of the SARS-CoV-2 P.1 strain. (B) Serum Wuhan-Hu-1 S-specific IgG kinetics measured using a MIA with purified, human S-specific IgG standards to estimate serum concentration. Dashed line indicates the limit of quantification (LOQ,  $\leq 4$  µg/mL). Individual values falling below the LOQ were set to  $\frac{1}{2}$  LOQ. Significance was calculated using a one-way ANOVA followed by a Dunnett's Multiple Comparison to Group D at each time point. (C) WA1/2020 neutralizing antibody kinetics were measured using a WT SARS-CoV-2 PRNT assay. Curve-fitted PRNT<sub>50</sub> titers were calculated using a sigmoidal dose response curve. Dashed line indicates the limit of detection (LOD,  $\leq 1:20$ ). Individual values falling below the LOD were set to  $\frac{1}{2}$  LOD. Significance was calculated using a Kruskal-Wallis Test followed by a Dunn's Multiple Comparison. (\* $p \leq 0.05$ , \*\* $p \leq 0.01$ ).



801

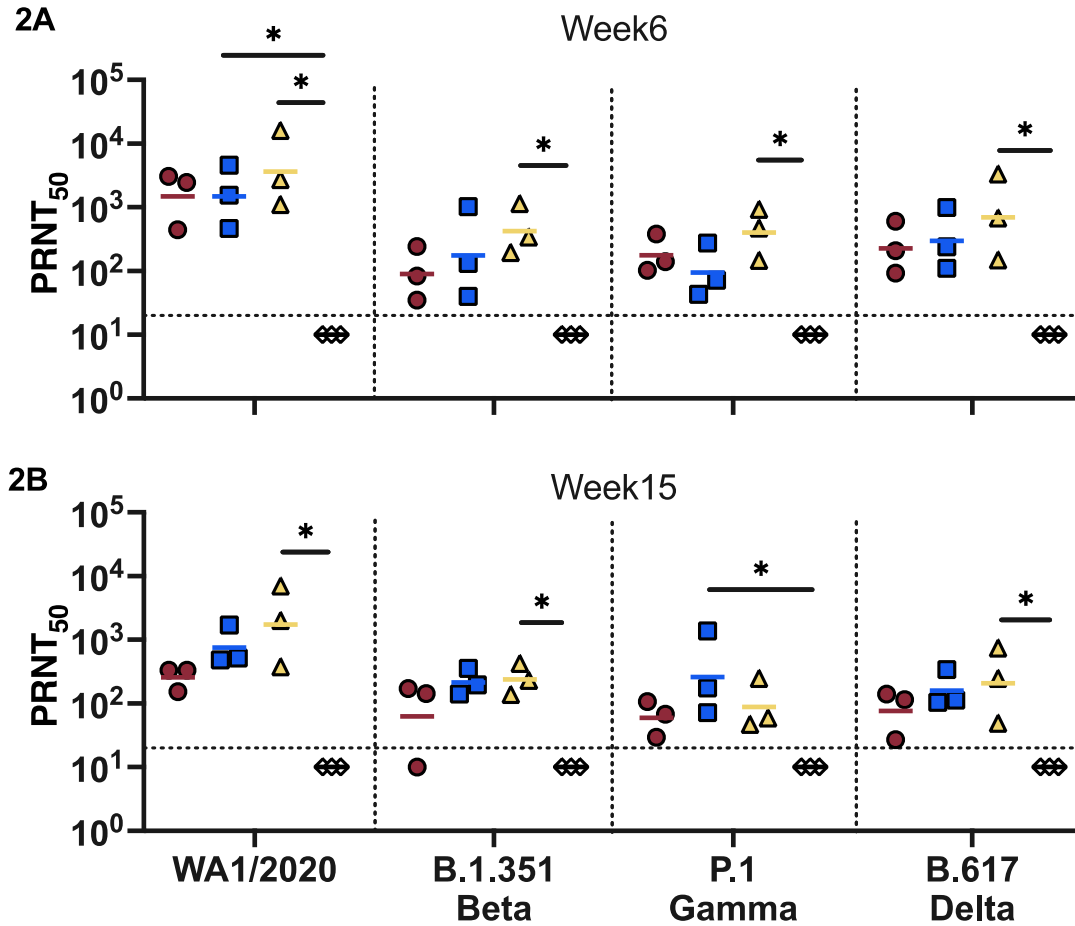

**Figure 2. Cross-Neutralizing Antibody Titers** Neutralizing antibody titers at (A) week 6 and (B) week 15 were measured using a WT SARS-CoV-2 PRNT assay with the WA1/2020, B.1.351 (Beta), P.1 (Gamma), B.1.617 (Delta) VOC. Curve-fitted PRNT<sub>50</sub> titers were calculated using a sigmoidal dose response curve. Dashed line indicates the LOD ( $\leq 1:20$ ). Individual values falling below the LOD were set to  $\frac{1}{2}$  LOD. Significance was calculated using a Kruskal-Wallis Test followed by a Dunn's Multiple Comparison to Group D at each time point. Horizontal bars mark the GMT of each group (\* $p \leq 0.05$ ).

802

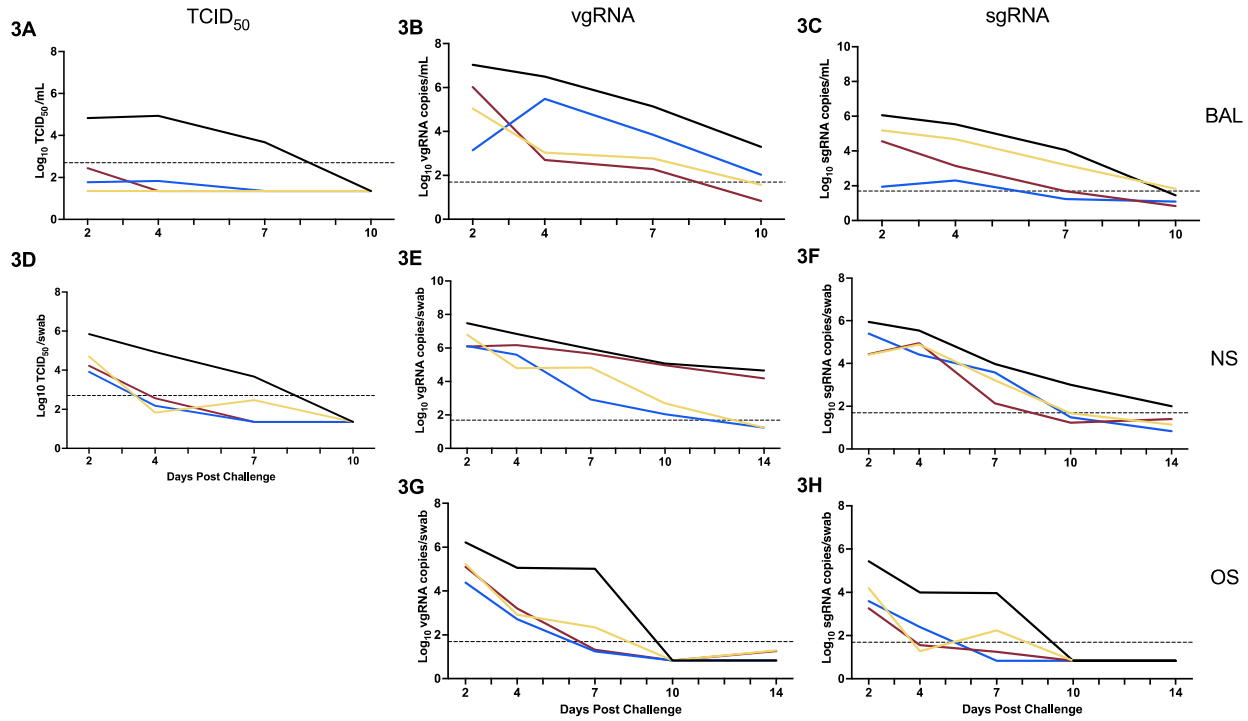

**Figure 3. Viral Load Kinetics after P.1 Challenge** GMT of the (A & D) TCID<sub>50</sub> titers; (B, E, G) viral genomic; and (C, F, H) subgenomic N RNA copies from the (A, B, C) bronchoalveolar lavage (BAL); (D, E, F) nasal swab (NS); and (G, H) oral swab (OS) collected at the time points indicated. Dashed line indicates the assay-specific LOD. Individual values falling below the LOD were set to ½ LOD.

803

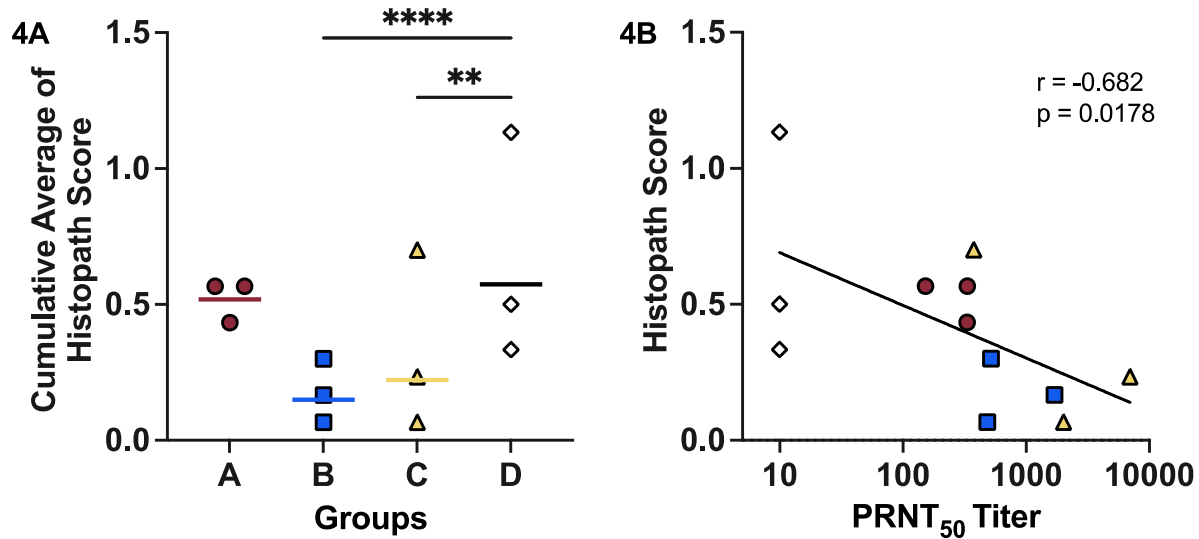

**Figure 4. Histopathology Score and Correlation with Neutralizing Antibodies** (A) Cumulative average histopathology score was determined by averaging the scores of six sections cut from each lobe and the bronchi. The presence and severity of edema, intra-alveolar inflammation, perivascular cuffing, increased BALT and interstitial inflammation was determined and assigned scores ranging from 0-3. Significant differences in lung histopathology were calculated using a one-way ANOVA followed by a Dunnett's multiple comparison to Group D with the scores from each section (30 scores per macaque) as replicates. Horizontal bars mark the GMT of each group. (\*\* $p \leq 0.01$ , \*\*\*\* $p \leq 0.0001$ ) (B) Correlation between histopathology scores and WA1/2020-specific PRNT<sub>50</sub> titers were determine using a Spearman's correlation test.

804

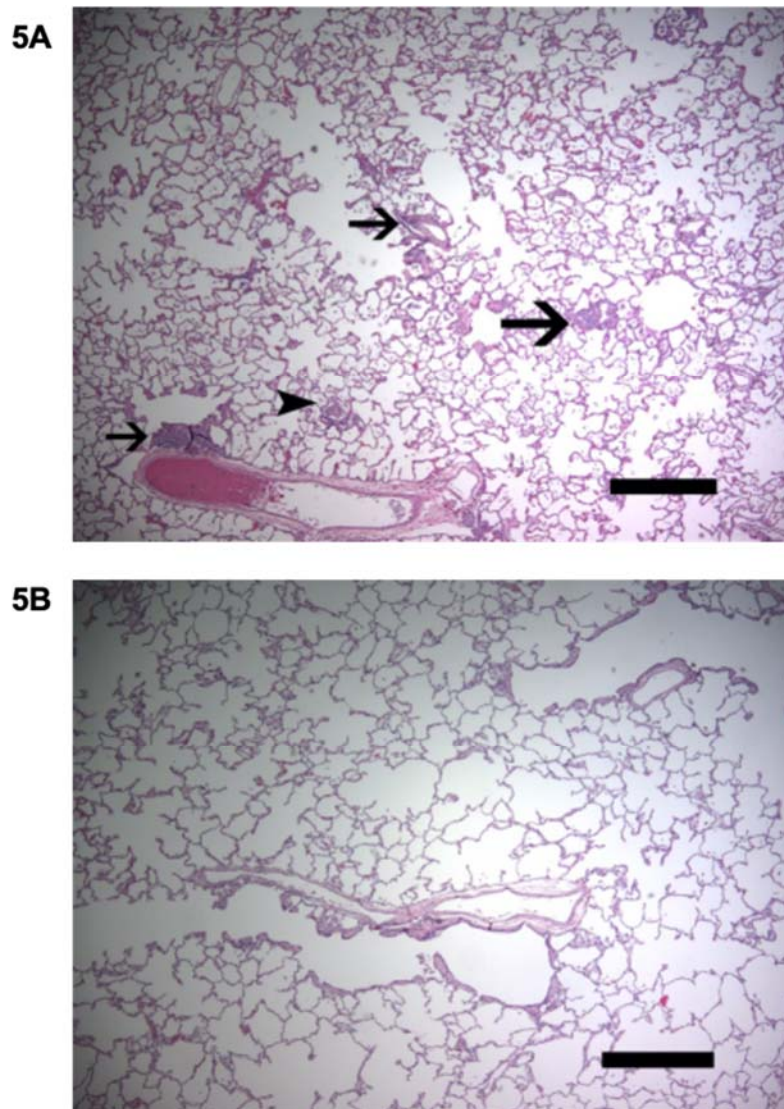

**Figure 5 Histopathology observed in Hematoxylin and Eosin-Stained Lung Sections of Control Cynomolgus Macaques Compared to Immunized Macaques after P.1 challenge (A)** Representative low power view of a lung section showing distribution of lymphocytic perivascular cuffing (arrows) and clusters of intraalveolar macrophages (arrowhead) in an unprotected macaque. (B) Representative low power view of a lung section from an immunized macaque which did not exhibit pathologic changes. Scale Bar = 500 microns.

805

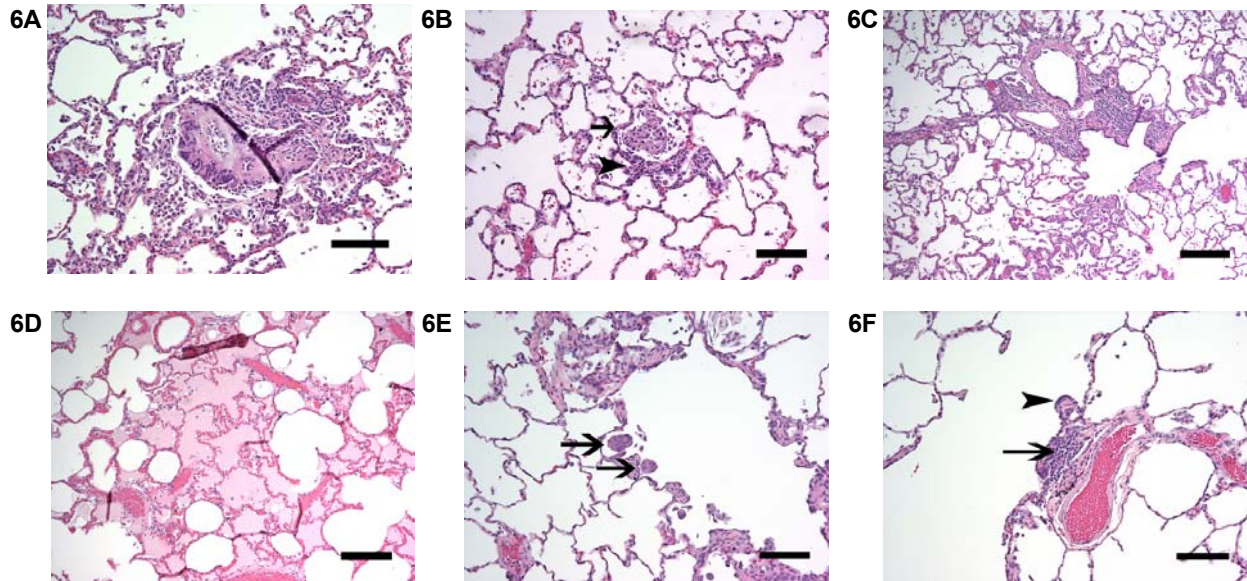

**Figure 6 Histopathology Observed in Control *Cynomolgus* Macaques Compared to that Observed in Immunized Macaques after P.1 Challenge** (A-D) unimmunized macaques. (A) A syncytium of intraalveolar multinucleated giant cells is seen surrounded by an acute and eosinophilic inflammatory infiltrate. (B) Increased intraalveolar macrophages and an intraalveolar multinucleated giant cell accompanied by interstitial lymphocytic inflammation and thickening. (C) Complete lymphocytic perivascular cuffing with increased intra-alveolar macrophages. (D) Proteinaceous edema fluid in alveolar spaces. (E-F) Immunized macaques. (E) Intraalveolar multinucleated giant cells (arrows) without increased intraalveolar macrophages, lymphocytic vascular cuffing or interstitial inflammation. (F) Partial lymphocytic perivascular cuff (arrow) with adjacent alveolar epithelial hyperplasia (arrowhead) without alveolar septal thickening. Scale bar = 10 microns.

806

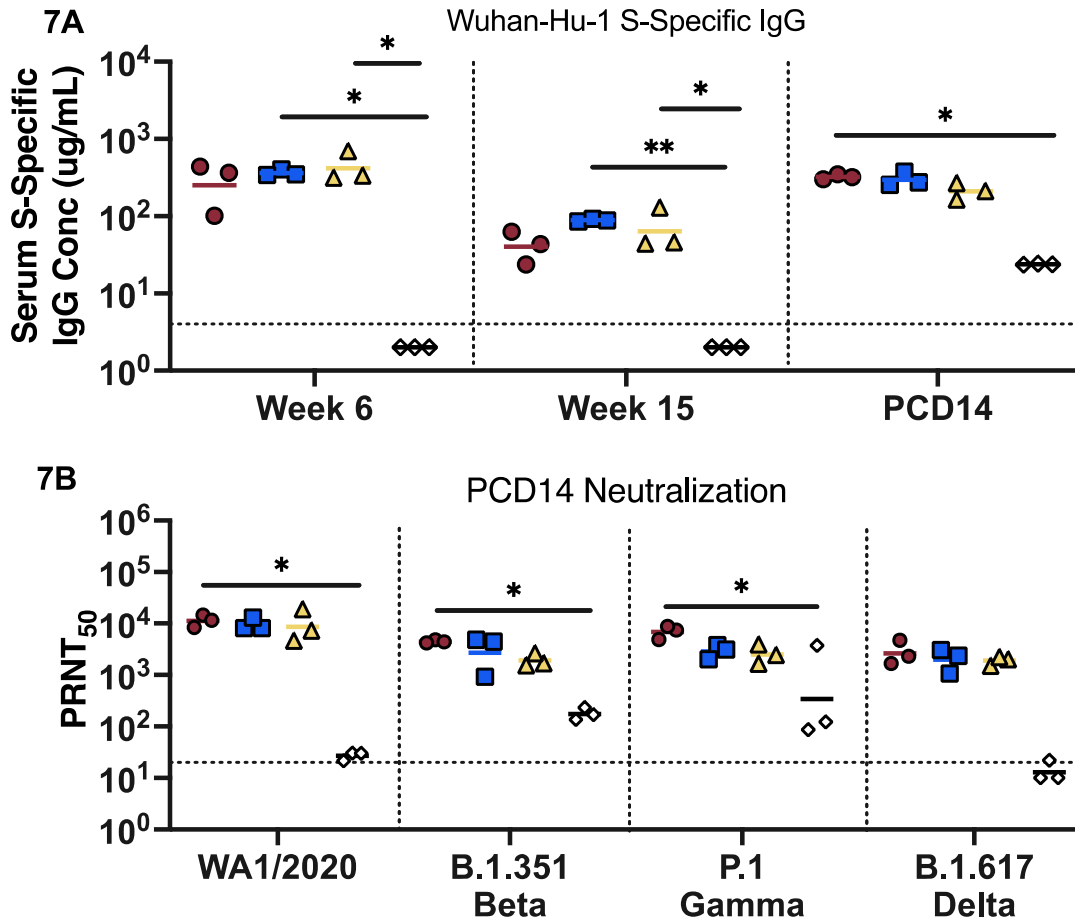

**Figure 7. Post-Challenge Anamnestic Response** (A) Vaccine-matched S-specific IgG conc. from sera collected at week 6, week 15 and at 14-days post-challenge, measured by MIA. IgG concentrations were estimated using a human S-specific IgG standard as described previously. Horizontal bars mark the GMT for each group. Dashed line indicates the LOQ ( $\leq 4 \mu\text{g}/\text{mL}$ ) Individual values falling below the LOQ were set to  $\frac{1}{2}$  LOQ (B) Neutralizing antibodies 14 days after P.1 challenge were measured using a WT SARS-CoV-2 PRNT<sub>50</sub> assay with the WA1/2020, B.1.351 (Beta), P.1 (Gamma), B.1.617 (Delta) VOC. Curve-fitted PRNT<sub>50</sub> titers were calculated using a sigmoidal dose response curve. Dashed line indicates the LOD ( $\leq 1:20$ ). Individual values falling below the LOD were set to  $\frac{1}{2}$  LOD. Significance was calculated using a Kruskal-Wallis Test followed by a Dunn's Multiple Comparison to Group D at each time point. (\* $p \leq 0.05$ , \*\* $p \leq 0.01$ ).
